# Supplementary material for: Assessing the Relationship Between Preoperative Anxiety and Postoperative Recovery
Source: Research Square preprint supplement (doi:10.21203/rs.3.rs-8038706/v1), 2025-12-22
Supplement: Supplementary file 1 [file 20cfa25874ed112c8ef8a987.docx]

**Supplementary File 1. Patient Information Form (English Version)**

1. **Age:….**
2. **Gender:**

a) Female  b) Male

1. **Education Level:**

a) Illiterate  b) Literate  c) Primary/Secondary School  d) High School  e) University

1. **Marital Status:**

a) Married  b) Single

1. **Employment Status:**

a) Yes  b) No

1. **Occupation:**

a) Housewife  b) Worker  c) Civil Servant  d) Self-employed  e) Unemployed  f) Retired  g) Student

1. **Socio-economic Status:**

a) Income below expenses

b) Income equal to expenses

c) Income above expenses

1. **Parenthood Status and Age of Children:**………

a) Yes  b) No

1. **Place of Residence:**

a) City  b) District  c) Village

1. **Presence of Chronic Disease:**

a) Yes  b) No

1. **If yes, type of chronic disease:**

a) Diabetes  b) Hypertension  c) Renal Failure  d) COPD  e) Other: ……………

**12. Diagnosis and type of surgery to be performed:……………………………………………………………**

**13. Previous surgical experience:**

a) Yes  b) No

**14. Previous hospitalization history (minimum 24 hours):**

a) Yes  b) No

**15. How many hours have you been hospitalized?..................**
